# Supplementary figures and images for: Phosphorylation of Puma modulates its apoptotic function by regulating protein stability
Source: PubMed Central journal article supplement — Cell Death Dis. 2010 Jul 29;1(7):e59–. doi: 10.1038/cddis.2010.38 (PMC3032554; doi:10.1038/cddis.2010.38), 2010-07-29

# Fricker et al. Supp Fig 1

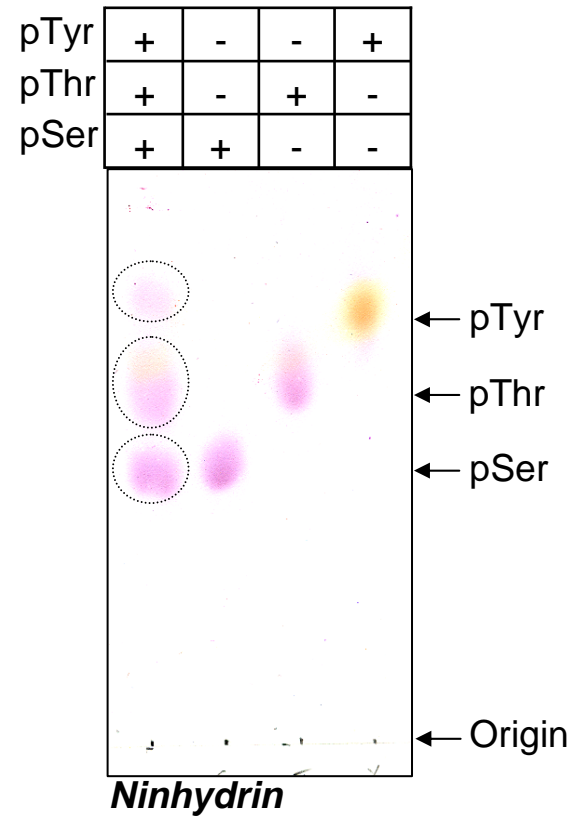

Supplement: cddis201038x1.pdf [file cddis201038x1.pdf]

# Fricker et al. Supp Fig 2

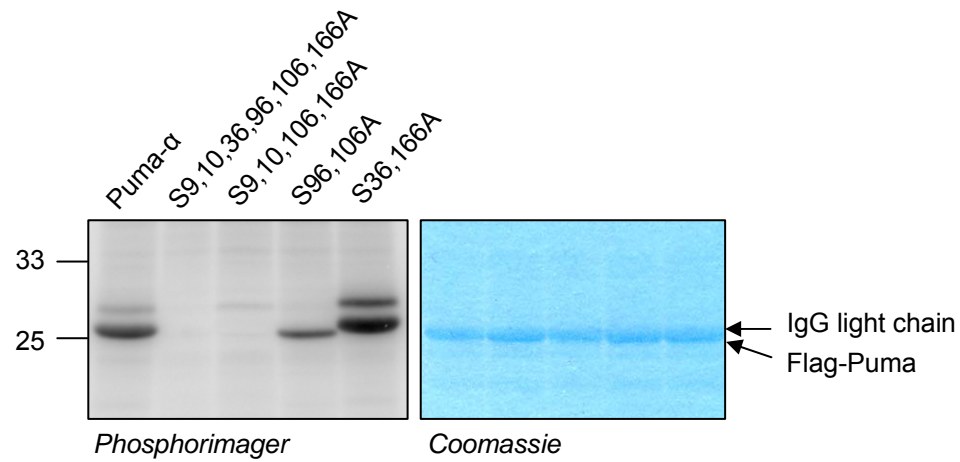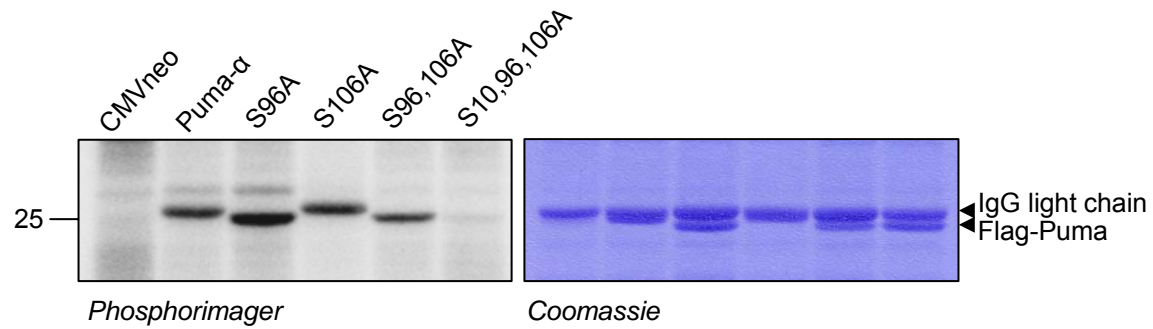

Supplement: cddis201038x2.pdf [file cddis201038x2.pdf]

# Fricker et al. Supp Fig 3

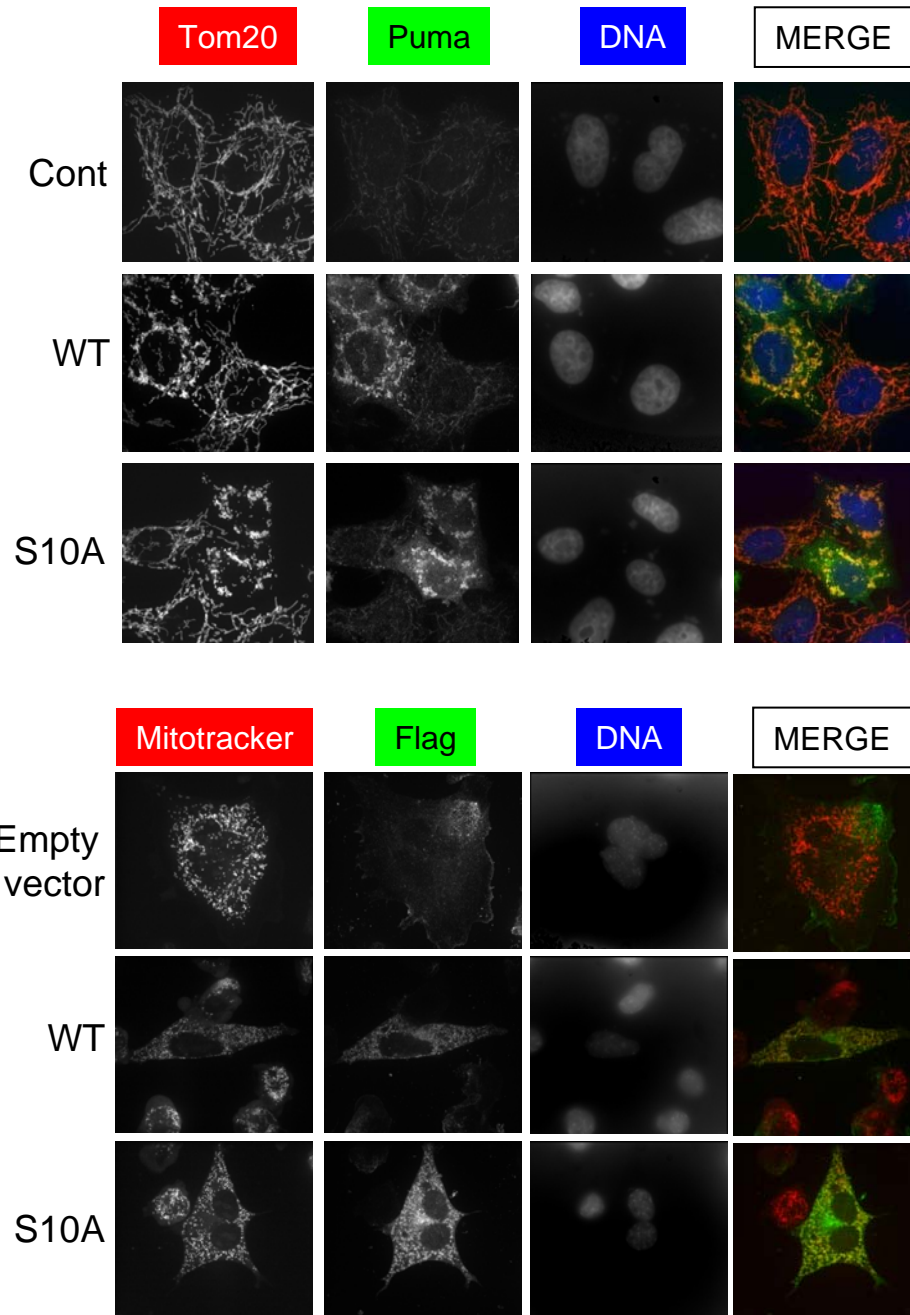

Supplement: cddis201038x3.pdf [file cddis201038x3.pdf]
